# Supplementary material
Source: PubMed Central journal article supplement (PMC4785837)
Supplement: NIHMS722794-supplement-1.pdf [file NIHMS722794-supplement-1.pdf]

1 **Supplemental Information**

2

3 **Figure S1. Host ranges of T7 and T3 phages, related to Figure 2. (A)** Host ranges of T7 and  
4 T3 phages. Each bacterial overnight culture and LB soft agar were mixed, and poured onto LB  
5 plates. 2.5  $\mu$ L of 10-fold serially diluted T7 and T3 phages were spotted onto the bacterial lawns  
6 and incubated at 37°C. T3 phage did not plaque efficiently on *E. coli* BW25113 and MG1655,  
7 whereas T7 phage plaqued efficiently on all tested *E. coli* strains. **(B)** Adsorption assay. Bacteria  
8 and T3 phage were mixed at an MOI  $\sim$ 0.5 and incubated for 10 min. Growth of adsorbed  
9 progeny was stopped by the addition of chloroform. After centrifugation, supernatants were  
10 serially diluted and mixed with *E. coli* BL21 and LB soft agar, and poured onto LB plates. After  
11 incubation at 37°C, phage plaques were counted, and adsorption efficiencies were calculated.  
12 The data are presented as the mean of three independent experiments, and the error bars  
13 represent the SD. Small error bars are obscured by bar charts.

14

15 **Figure S2. Plaque formation assays with natural, reconstructed wild-type, and synthetic**  
16 **phages, related to Figure 3.** Bacterial lawns were spotted with 2.5  $\mu$ L of 10-fold serially diluted  
17 phages and incubated at 30 or 37°C. Synthetic phages showed tail-fiber- or tail-component-  
18 dependent host ranges and the ability to cross between species. T7 and T7<sub>WT</sub>, T3 and T3<sub>WT</sub>, and  
19 K11 and K11<sub>WT</sub> phages are the same at the genetic level; however, T7<sub>WT</sub>, T3<sub>WT</sub>, and K11<sub>WT</sub>  
20 phages were created by capturing the genomes in yeast and then rebooting these phage genomes  
21 in bacteria. Efficiency of plating (EOP) results are shown in Figure 3.

22

23 **Figure S3. Plaque formation assays with T7<sub>K11(gp11-12-17)</sub> and K11<sub>T7(gp11-12-17)</sub>, related to**  
24 **Figure 5.** 2.5 µL of 10-fold serially diluted phages were spotted onto bacterial lawns and  
25 incubated at 37°C. K11<sub>T7(gp11-12-17)</sub> adopted the host range of T7<sub>WT</sub> while T7<sub>K11(gp11-12-17)</sub> adopted  
26 the host range of K11, thus demonstrating that tail component swapping can lead to acquisition  
27 of novel host ranges.

28  
29 **Figure S4. Antimicrobial susceptibilities of *E. coli* Nissle 1917, *Klebsiella* sp. 390, and *Y.***  
30 ***pseudotuberculosis* IP2666, related to Figure 6.** (A) Five microliters of each overnight cultures  
31 (>10<sup>9</sup> CFU/ml) for each bacteria were streaked on LB plates with or without antibiotics. Plates  
32 were incubated at 30°C for 24 h. *Klebsiella* sp. 390 was naturally resistant to 25 µg/ml  
33 carbenicillin and *Y. ptb* IP2666 was naturally resistant to 1 µg/ml triclosan, while *E. coli* Nissle  
34 1917 was sensitive to both. (B) Diluted log-phase cultures were plated onto LB with or without  
35 antibiotics. After incubation at 30°C for 18-24 h, colonies were enumerated. These  
36 concentrations of antimicrobials completely killed susceptible strains but did not visibly affect  
37 the growth of resistant strains.

38  
39 **Figure S5. Antimicrobial susceptibilities of *E. coli* Nissle 1917, *E. coli* ECOR16, and *Y.***  
40 ***pseudotuberculosis* IP2666, related to Figure S6.** (A) Five microliters of each overnight  
41 cultures (>10<sup>9</sup> CFU/ml) for each bacteria were streaked on LB plates with or without antibiotics.  
42 Plates were incubated at 30°C for 24 h. *E. coli* ECOR16 was naturally resistant to 50 µg/ml  
43 streptomycin and *Y. ptb* IP2666 was naturally resistant to 1 µg/ml triclosan, while *E. coli* Nissle  
44 1917 was sensitive to both. (B) Diluted log-phase cultures were plated onto LB with or without  
45 antibiotics. After incubation at 30°C for 18-24 h, colonies were enumerated.

46  
47  
48  
49  
50  
51  
52  
53  
54  
55  
56  
57  
58  
59  
60  
61  
62  
63  
64  
65  
66

**Figure S6. Microbial population editing assay with synthetic T3-based cocktail, related to**

**Figure 6.** A synthetic microbial community composed of *E. coli* Nissle 1917, *E. coli* ECOR16, and *Y. ptb* IP2666 was treated with individual synthetic phages (T3<sub>WT</sub> and T3<sub>R(gp17)</sub>) and the pairwise combination of these phages. After adding ~10<sup>7</sup> PFU/ml of each phage, the resulting samples were incubated at 30°C with shaking for 1 h. At each time point, bacteria were collected, washed in saline, serially diluted, and plated onto selective plates for viable cell counts after a 24 h incubation at 30°C. The data are presented as the mean of three independent experiments and the total numbers of cells (CFU/ml) are shown. The sizes of the pie charts reflect the total number of cells. Note that the chart does not allow the display of fractions smaller than ~1%. The detailed data are shown in Table S4B.

**Table S1, related to Figure 1.** Results of plaque formation assays on *E. cloni* 10G and one-time phage propagation assays in *E. cloni* 10G for natural phages.

**Table S2, related to Figure 2.** Sequence of codon-optimized and fully synthesized gene 17 of phage 13a.

**Table S3, related to Figure 4 and 5.** (A) Detailed data for the *Y. ptb* IP2666 killing assay (Figure 4C). (B) Detailed data for the *Klebsiella* sp. 390 killing assay (Figure 5C).

67 **Table S4, related to Figure 6 and S6.** (A) Detailed data for microbial population editing with  
68 engineered phages from Figure 6. (B) Detailed data for microbial population editing with  
69 engineered phages from Figure S6.

70

71 **Table S5, related to Experimental Procedures.** Description of synthetic phages created in this  
72 study.

73

74 **Table S6, related to Experimental Procedures.** Oligonucleotide primers used in this study.

# Figure S1

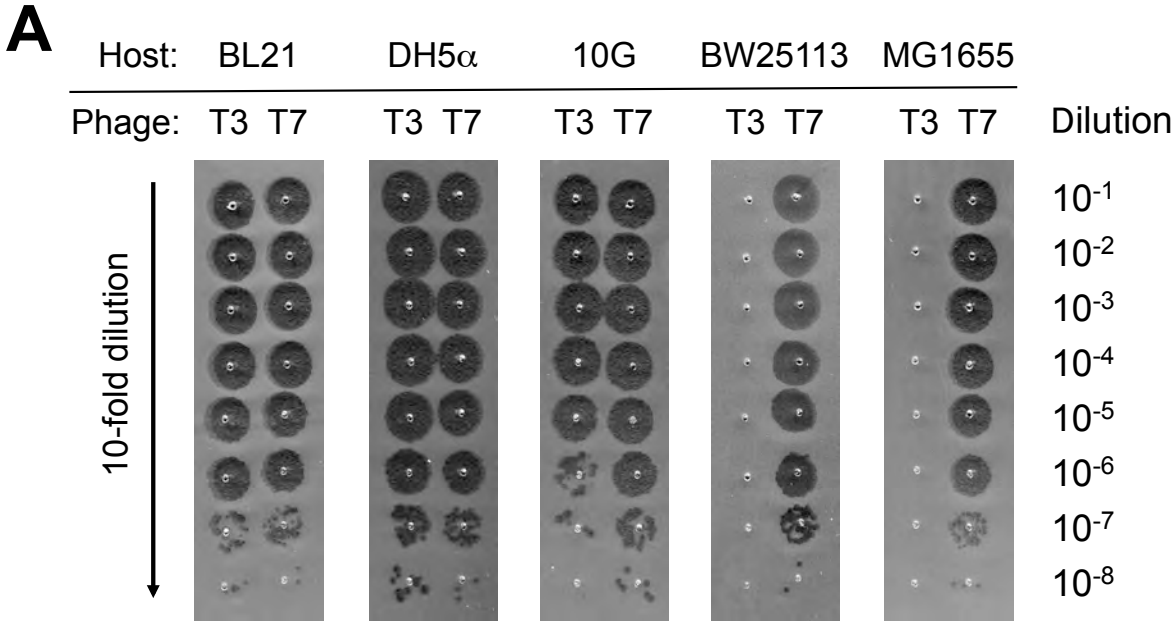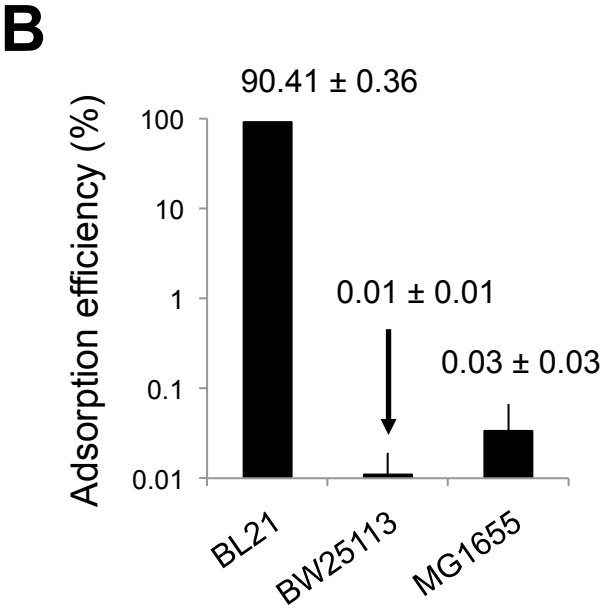

# Figure S2

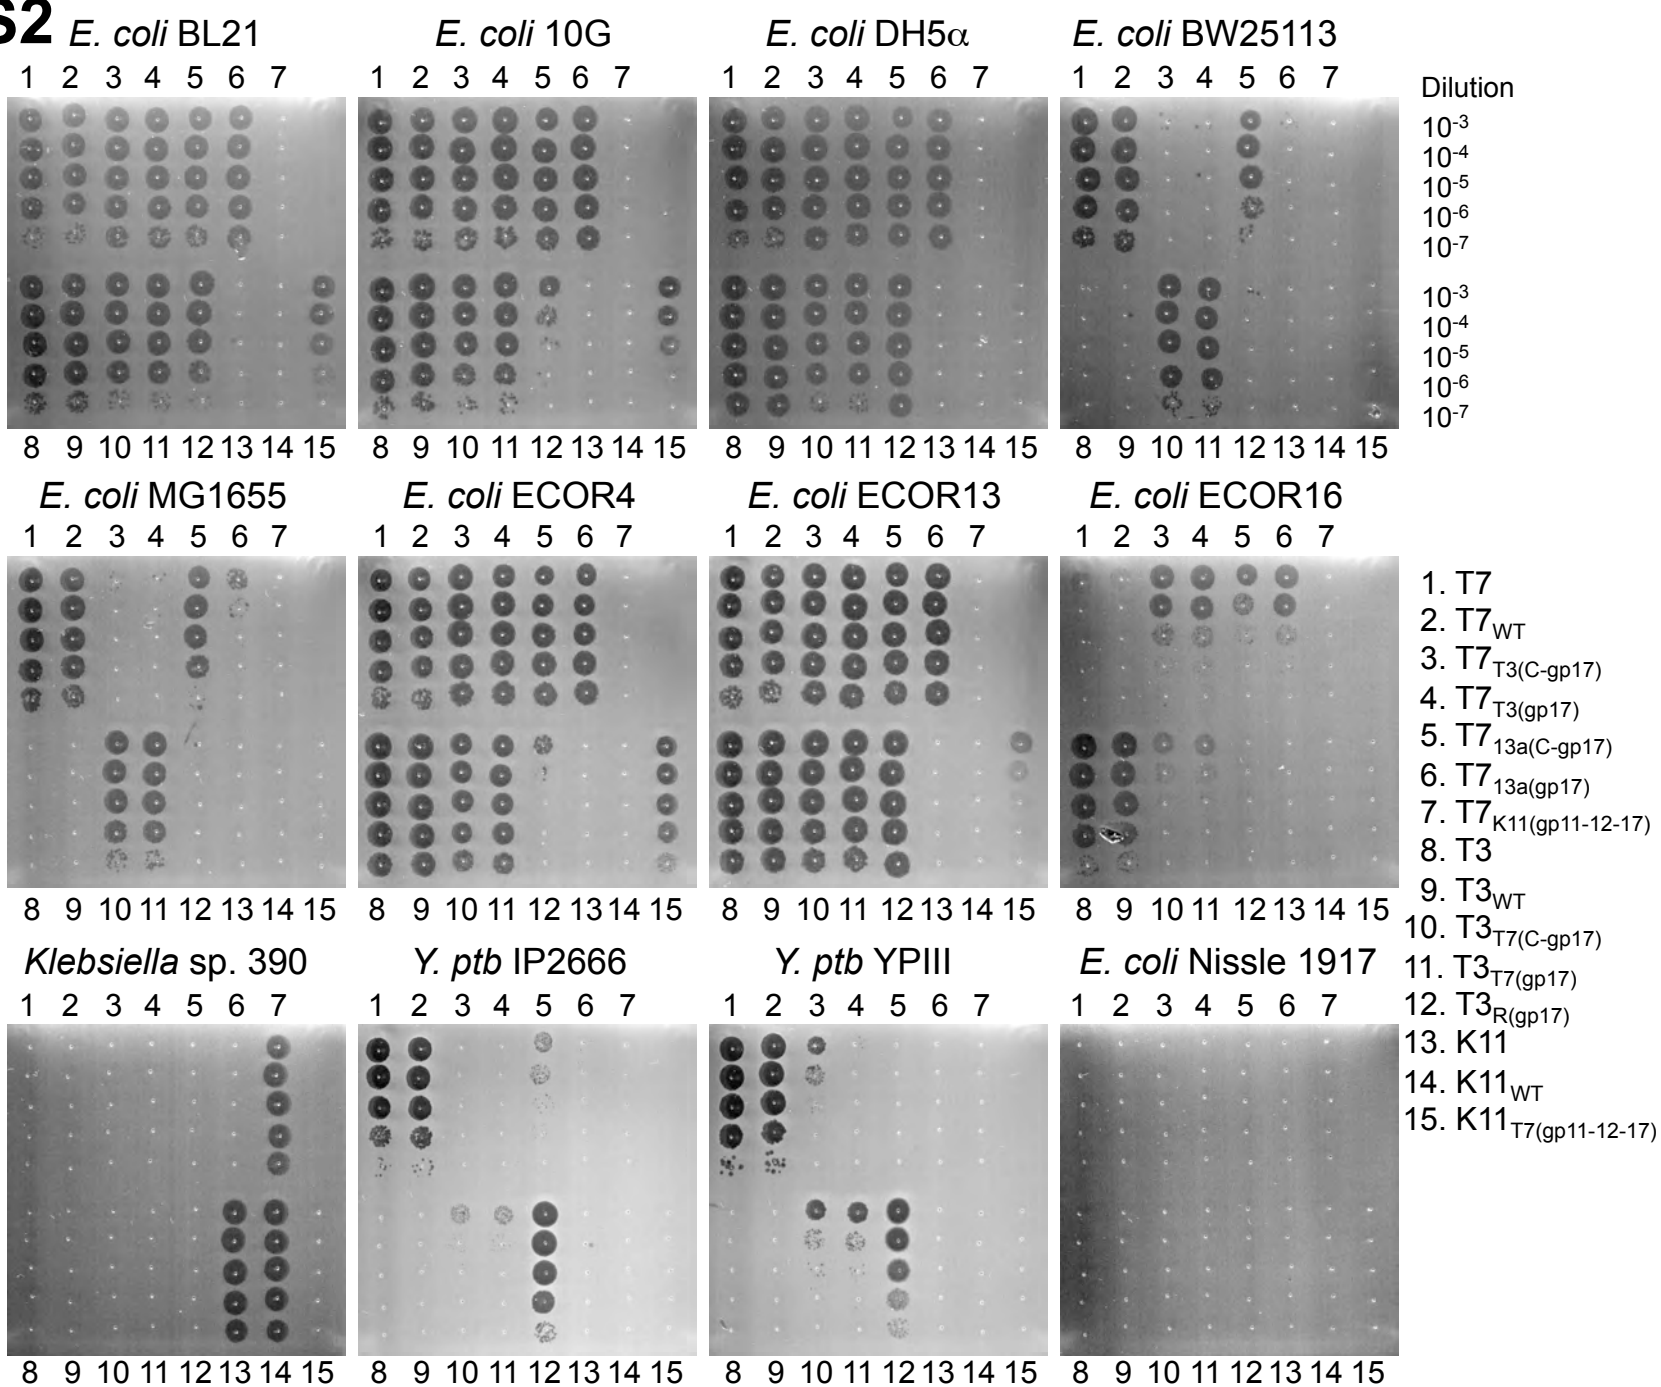



**Figure S4**

**A**

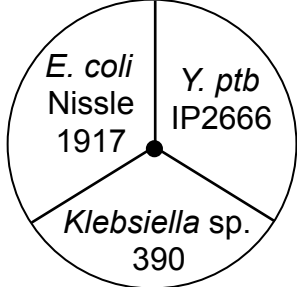

Control  
LB

Carbenicillin  
25  $\mu$ g/ml

Triclosan  
1  $\mu$ g/ml

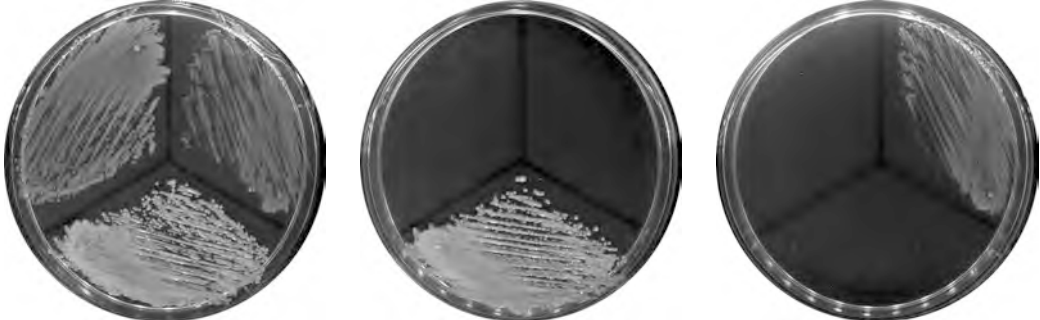

**B**

*E. coli* Nissle 1917

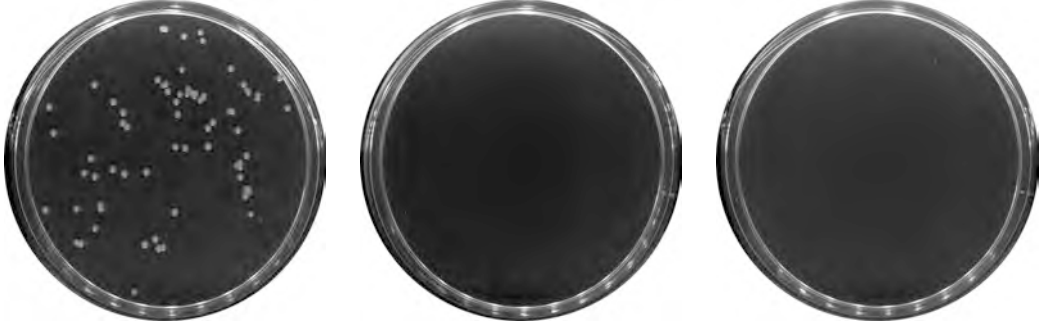

*Klebsiella* sp. 390

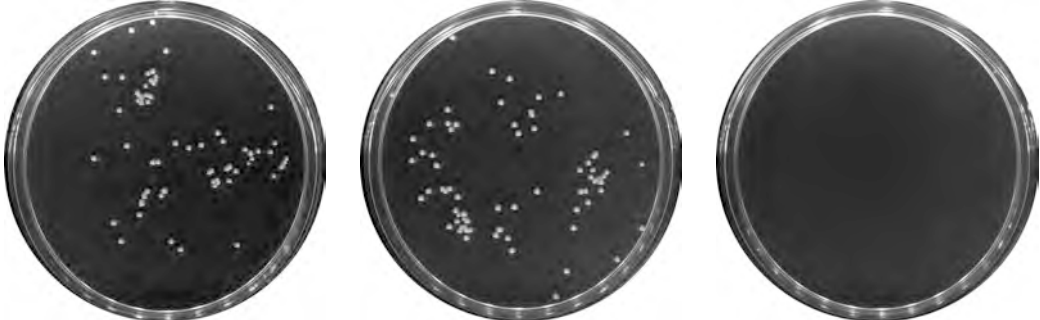

*Y. ptb* IP2666

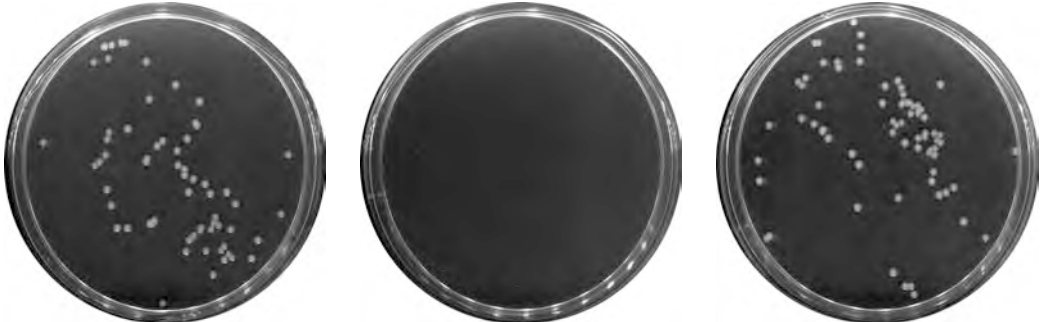



# Figure S5

**A**

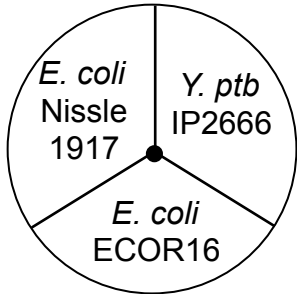

Control  
LB

Streptomycin  
50  $\mu$ g/ml

Triclosan  
1  $\mu$ g/ml

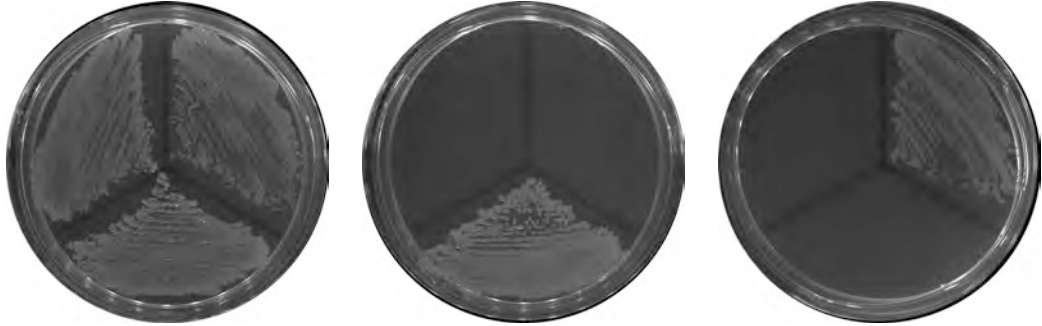

**B**

*E. coli* Nissle 1917

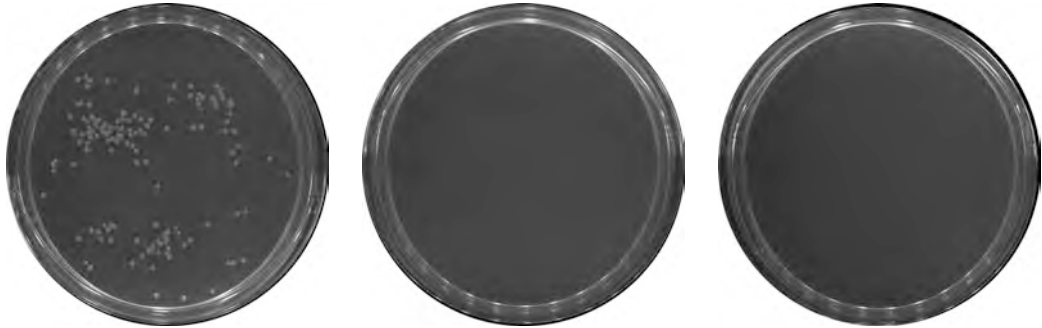

*E. coli* ECOR16

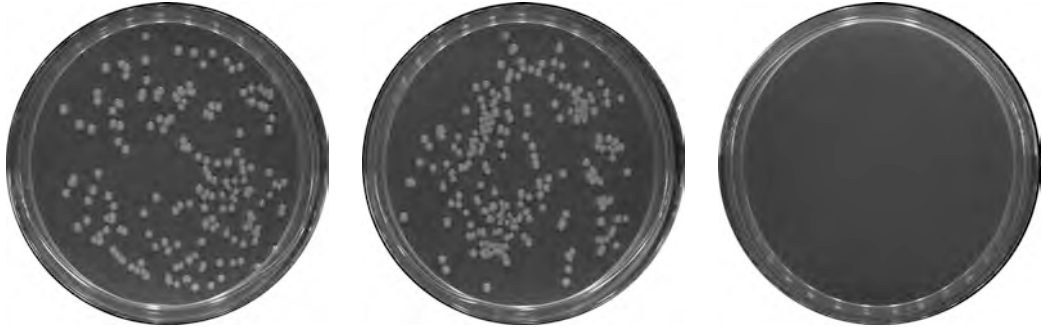

*Y. ptb* IP2666

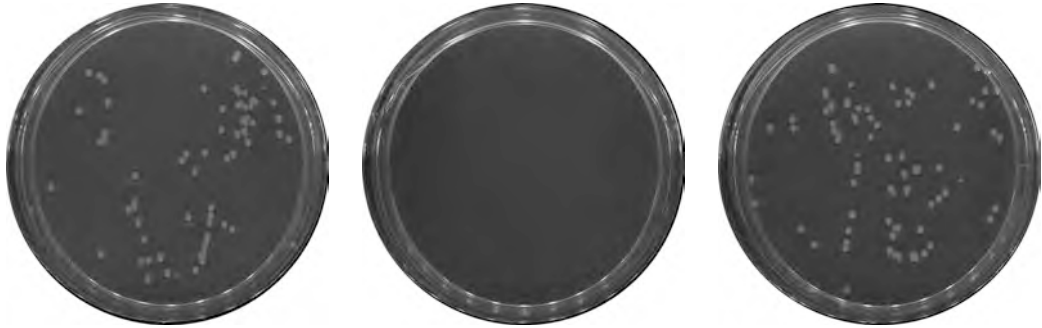

# Figure S6

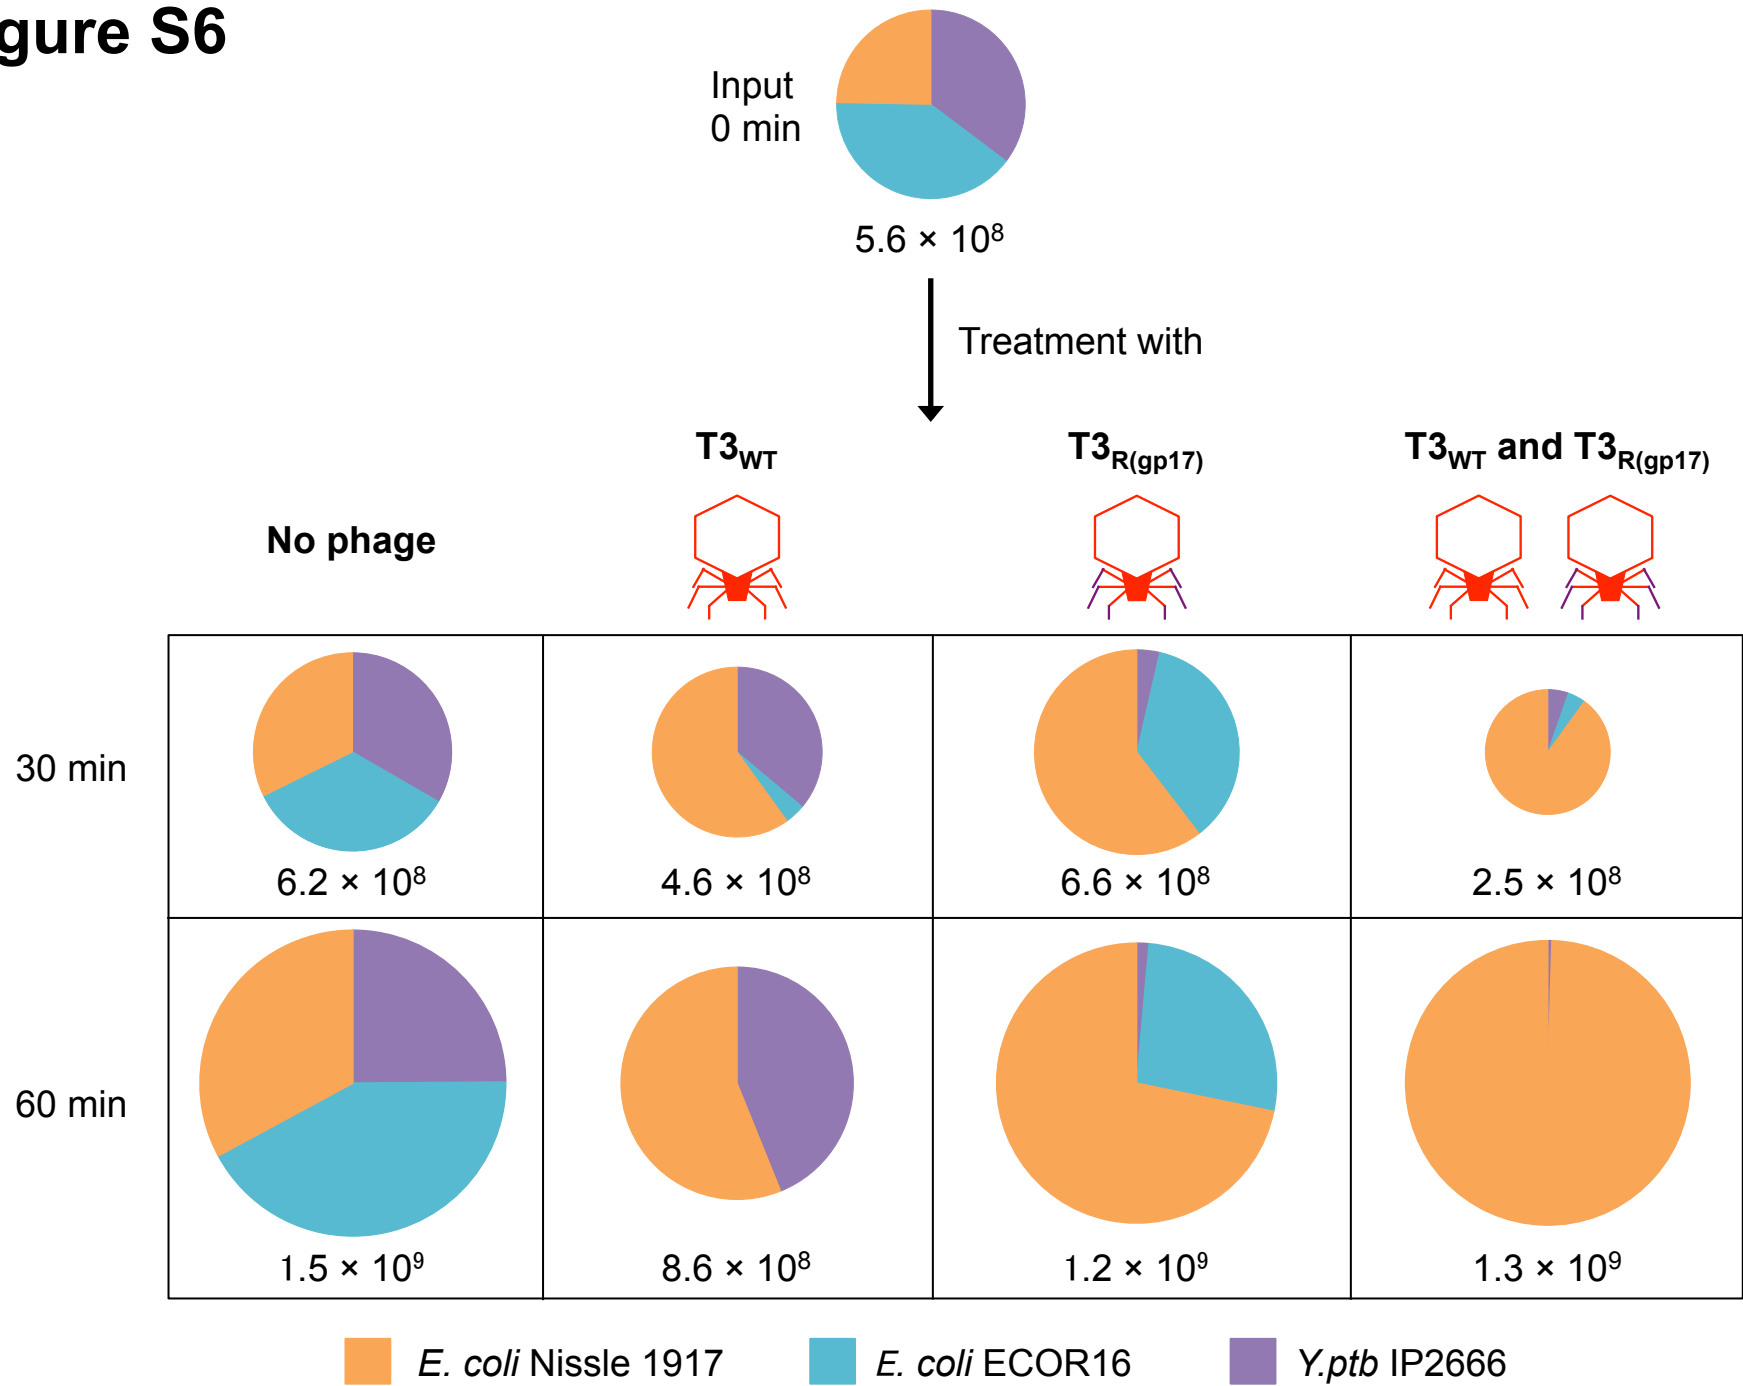

# Table S1

One-time phage propagation assay.

| Phage | Plaque formation on <i>E. cloni</i> 10G | Propagation in <i>E. cloni</i> 10G | Host bacteria               |
|-------|-----------------------------------------|------------------------------------|-----------------------------|
| T7    | Yes                                     | Yes                                | <i>E. coli</i> BL21         |
| T3    | Yes                                     | Yes                                | <i>E. coli</i> BL21         |
| K1E   | No                                      | Yes                                | <i>E. coli</i> IJ1668       |
| K1F   | No                                      | Yes                                | <i>E. coli</i> IJ1668       |
| K1-5  | No                                      | Yes                                | <i>E. coli</i> IJ1668       |
| SP6   | No                                      | Yes                                | <i>S. typhimurium</i> IJ612 |
| LUZ19 | No                                      | Yes                                | <i>P. aeruginosa</i> PAO1   |
| gh-1  | No                                      | Yes                                | <i>P. putida</i> C1S        |
| K11   | No                                      | Yes                                | <i>Klebsiella</i> sp. 390   |

## Table S2

Sequence of codon-optimized 13a gene 17.

ATGGCGAATGTGATTAAGACCGTTCTGACGTATCAGTTAGATGGATCCAATAGCGATTTTAATATTCCATTTGAAT  
ACCTGGCGCGCAAATTTGTCGCCGTGACGCTGATTGGGGTTGATCGCAAGGTATTAACCATTAACACCGACTAT  
CGCTTTGCTACGCGCACGACCATCTCTCTCACTAAGGCGTGGGGACCGGCGGATGGTTATACTACCATCGAGT  
TGCGCCGCGTTACGTGACAACCTGACCGCCTCGTGGACTTTACCGACGGTAGCATTCTGCGTGCGTACGATC  
TTAACGTGGCCCAGATTGAGACAATCCACGTGCGAGAAGAAGCACGTGACCTGACTGCCGACACCATTGGCG  
TAAACAATGACGGCCATCTGGATGCGCGCGGTGCGCCGATTGTCAATTTGGCGAACGCCGTTGATGATCGTGA  
TGCGGTGCCGCTCGGCCAACTCAAACTATGAATCAGAACAGTTGGCAGGCTCGCAACGAGGCACTGCAATT  
CCGCAATGAAGCCGAAACTTTTCGCAATCAGGCGGAAGGTTTTAAAACGAGAGCGGTACTAACGCCACTAAC  
ACGAAACAGTGGCGCGACGAGACAAAAGGCTTCCGCGACGAAGCGGAACAATTTAAGAACACCGCGGGTCA  
GTATGATACATCCGCGGGTAACAGCGCGAGCGCTGCCCATCAGAGCGAAGTAAACGCAGAAAACAGTGCGAC  
CGCGTCCGCTAATAGCGCCACCTCGCCGAGCAACAGGCCGATCGCGCGGAGCGTGAAGCTGATAAACTCG  
GCAACTTTAATGGTCTTGCTGGTGGATCGACAAGGTCGACGGCACAACCGTGTATTGGAAAGGTAACATCCA  
TGCAAACGGTCGCCTCTACATCACGACCAATGGCTTCGACTGCGGTCAATATCAGCAGTTCTTTGGTGGCGAT  
ACGAATCGCTACAGCGTGATGGAATGGGGTGACGATAACGGGTGGCTGATGTATGTGCAGCGCCGTGAATGG  
ACCACCGCAATCGGCGGCAACATTCAGTTGGTTGTCAACGGTCAGATCATCACCCAGGGCGGTGCCATGACG  
GGGCAACTGAACTTCAGAATGGTCACGTTCTGCAATTGGAATCCGCCAGTGACAAAGCGCATTATATTTATC  
AAAGGATGGCAACCGTAATAATTGGTATATTGGTCGTGGATCGGATAACAATAACGACTGCACGTTTCACTCCTA  
CGTTCACGGTACCACGTTAACCTTGAAACAGGATTATGCAGTGGTCAACAAACACTTTCATGTGGGACAGGCG  
GTCGTGTCAACTGATGGCAATATCCAGGGCACCAATGGGGTGGTAAATGGCTGGATGTTTATTTAAATGATAC  
ATACGTTAAGAAAACGATGGCTTGGACACAAGTGTGGGCTGCGGACTCGGGTAAATACCTCCCGGGTGGGAG  
TCAAACCTGATACTCTGCCGCAAGGATCTGCGTTTCCGCAACATCTGGATTTCGTACGCGTAACAACCTATTGGAAC  
TTTTTCGCACGGGCCCGGATGGGATCTATTTCTGTGCGGCTGAAGGAGGTTGGCTGAAATTTGAGATCCACTC  
AAACGGTCGCGTCTTCAAAAACATCTCTGATCGCGACGCACCCCGACCGCAATCGCTGTGGAAGACGTTTAA

# Table S3

## A

| Time after treatment | log <sub>10</sub> (mean ± SD CFU/ml) |                  |                       |
|----------------------|--------------------------------------|------------------|-----------------------|
|                      | Control (no phage)                   | T3 <sub>WT</sub> | T3 <sub>R(gp17)</sub> |
| 0 min                | 8.312 ± 0.052                        | 8.312 ± 0.052    | 8.312 ± 0.052         |
| 30 min               | 8.503 ± 0.131                        | 8.412 ± 0.055    | 7.799 ± 0.048         |
| 60 min               | 8.585 ± 0.046                        | 8.556 ± 0.020    | 6.369 ± 0.096         |
| 90 min               | 8.732 ± 0.072                        | 8.685 ± 0.046    | 3.301 ± 0             |
| 120 min              | 8.727 ± 0.116                        | 8.767 ± 0.120    | 3.301 ± 0             |
| 150 min              | 9.016 ± 0.100                        | 8.903 ± 0.246    | 3.301 ± 0             |
| 180 min              | 9.219 ± 0.051                        | 9.263 ± 0.084    | 3.301 ± 0             |

## B

| Time after treatment | log <sub>10</sub> (mean ± SD CFU/ml) |                   |                  |                               |
|----------------------|--------------------------------------|-------------------|------------------|-------------------------------|
|                      | Control (no phage)                   | K11 <sub>WT</sub> | T7 <sub>WT</sub> | T7 <sub>K11(gp11-12-17)</sub> |
| 0 min                | 8.579 ± 0.019                        | 8.579 ± 0.019     | 8.579 ± 0.019    | 8.579 ± 0.019                 |
| 15 min               | 8.796 ± 0.070                        | 7.560 ± 0.197     | 8.715 ± 0.035    | 7.952 ± 0.269                 |
| 30 min               | 8.869 ± 0.188                        | 5.400 ± 0.288     | 8.900 ± 0.142    | 6.354 ± 0.195                 |
| 45 min               | 9.117 ± 0.086                        | 3.301 ± 0         | 9.053 ± 0.037    | 5.053 ± 0.518                 |
| 60 min               | 9.199 ± 0.145                        | 3.301 ± 0         | 9.253 ± 0.127    | 5.036 ± 0.419                 |
| 75 min               | 9.365 ± 0.048                        | 3.301 ± 0         | 9.350 ± 0.069    | 5.026 ± 0.037                 |

# Table S4

## A

| Treatment                            | Time after treatment | <i>E. coli</i> Nissle 1917 | log <sub>10</sub> (mean ± SD CFU/ml) |                      |
|--------------------------------------|----------------------|----------------------------|--------------------------------------|----------------------|
|                                      |                      |                            | <i>Klebsiella</i> sp. 390            | <i>Y. ptb</i> IP2666 |
| No phage                             | 0 min                | 8.300 ± 0.036              | 8.307 ± 0.086                        | 8.290 ± 0.155        |
|                                      | 30 min               | 8.327 ± 0.037              | 8.407 ± 0.084                        | 8.312 ± 0.125        |
|                                      | 60 min               | 8.598 ± 0.148              | 8.761 ± 0.123                        | 8.524 ± 0.180        |
| T7 <sub>WT</sub>                     | 30 min               | 8.355 ± 0.018              | 8.390 ± 0.043                        | 6.341 ± 0.032        |
|                                      | 60 min               | 8.768 ± 0.114              | 8.560 ± 0.400                        | 3.301 ± 0            |
| T3 <sub>WT</sub>                     | 30 min               | 8.327 ± 0.037              | 8.379 ± 0.030                        | 8.331 ± 0.100        |
|                                      | 60 min               | 8.861 ± 0.059              | 8.935 ± 0.046                        | 8.709 ± 0.192        |
| K11 <sub>WT</sub>                    | 30 min               | 8.368 ± 0.018              | 5.386 ± 0.154                        | 8.327 ± 0.037        |
|                                      | 60 min               | 8.935 ± 0.046              | 3.301 ± 0                            | 8.820 ± 0.059        |
| T7 <sub>K11gp(11-12-17)</sub>        | 30 min               | 8.379 ± 0.030              | 6.740 ± 0.230                        | 8.361 ± 0.080        |
|                                      | 60 min               | 8.861 ± 0.059              | 5.560 ± 0.197                        | 8.324 ± 0.643        |
| T3 <sub>R(gp17)</sub>                | 30 min               | 8.367 ± 0.034              | 8.436 ± 0.015                        | 7.587 ± 0.163        |
|                                      | 60 min               | 8.984 ± 0.115              | 8.994 ± 0.072                        | 6.327 ± 0.460        |
| T7 and T7 <sub>K11(gp11-12-17)</sub> | 30 min               | 8.414 ± 0.027              | 6.968 ± 0.046                        | 6.588 ± 0.223        |
|                                      | 60 min               | 8.987 ± 0.063              | 5.683 ± 0.350                        | 3.301 ± 0            |

## B

| Treatment                                  | Time after treatment | <i>E. coli</i> Nissle 1917 | log <sub>10</sub> (mean ± SD CFU/ml) |                      |
|--------------------------------------------|----------------------|----------------------------|--------------------------------------|----------------------|
|                                            |                      |                            | <i>E. coli</i> ECOR16                | <i>Y. ptb</i> IP2666 |
| No phage                                   | 0 min                | 8.127 ± 0.127              | 8.354 ± 0.037                        | 8.295 ± 0.072        |
|                                            | 30 min               | 8.183 ± 0.346              | 8.339 ± 0.059                        | 8.326 ± 0.059        |
|                                            | 60 min               | 8.657 ± 0.177              | 8.793 ± 0.084                        | 8.529 ± 0.187        |
| T3 <sub>WT</sub>                           | 30 min               | 8.422 ± 0.131              | 7.249 ± 0.073                        | 8.195 ± 0.155        |
|                                            | 60 min               | 8.574 ± 0.354              | 5.534 ± 0.111                        | 8.545 ± 0.169        |
| T3 <sub>R(gp17)</sub>                      | 30 min               | 8.604 ± 0.031              | 8.379 ± 0.030                        | 7.355 ± 0.153        |
|                                            | 60 min               | 8.917 ± 0.203              | 8.486 ± 0.209                        | 6.869 ± 0.630        |
| T3 <sub>WT</sub> and T3 <sub>R(gp17)</sub> | 30 min               | 8.219 ± 0.622              | 7.008 ± 0.500                        | 7.271 ± 0.022        |
|                                            | 60 min               | 9.106 ± 0.138              | 4.271 ± 0.022                        | 6.781 ± 0.098        |

## Table S5

Synthetic phages.

| Phage                         | Genotype                                                | Description                      |
|-------------------------------|---------------------------------------------------------|----------------------------------|
| T7 <sub>WT</sub>              | T7 wild-type                                            | Synthesized from PCR products    |
| T3 <sub>WT</sub>              | T3 wild-type                                            | Synthesized from PCR products    |
| K1E <sub>WT</sub>             | K1E wild-type                                           | Synthesized from PCR products    |
| K1F <sub>WT</sub>             | K1F wild-type                                           | Synthesized from PCR products    |
| K1-5 <sub>WT</sub>            | K1-5 wild-type                                          | Synthesized from PCR products    |
| SP6 <sub>WT</sub>             | SP6 wild-type                                           | Synthesized from PCR products    |
| gh-1 <sub>WT</sub>            | gh-1 wild-type                                          | Synthesized from PCR products    |
| K11 <sub>WT</sub>             | K11 wild-type                                           | Synthesized from PCR products    |
| T7 <sub>T3(C-gp17)</sub>      | T7 <sub>WT</sub> gene 17 (1-447)-T3 gene 17 (448-1677)  | T7 with T7-T3 hybrid tail fiber  |
| T7 <sub>T3(gp17)</sub>        | T7 <sub>WT</sub> Δgene 17, T3 gene 17                   | T7 with T3 tail fiber            |
| T7 <sub>13a(C-gp17)</sub>     | T7 <sub>WT</sub> gene 17 (1-450)-13a gene 17 (451-1677) | T7 with T7-13a hybrid tail fiber |
| T7 <sub>13a(gp17)</sub>       | T7 <sub>WT</sub> Δgene 17, 13a gene 17                  | T7 with 13a tail fiber           |
| T7 <sub>K11(gp11-12-17)</sub> | T7 <sub>WT</sub> Δgene (11 12 17), K11 gene (11 12 17)  | T7 with K11 tail                 |
| T3 <sub>T7(C-gp17)</sub>      | T3 <sub>WT</sub> gene 17(1-447)-T7 gene 17(448-1662)    | T3 with T3-T7 hybrid tail fiber  |
| T3 <sub>T7(gp17)</sub>        | T3 <sub>WT</sub> Δgene 17, T7 gene 17                   | T3 with T7 tail fiber            |
| T3 <sub>R(gp17)</sub>         | T3 <sub>WT</sub> Δgene 17, R gene 17                    | T3 with R tail fiber             |
| K11 <sub>T7(gp11-12-17)</sub> | K11 <sub>WT</sub> Δgene (11 12 17), T7 gene (11-12 17)  | K11 with T7 tail                 |
